# Supplementary material for: Antibiotic Resistance and MecA Gene in Isolates of <em>Staphylococcus spp</em>. in Bats
Source: Preprints.org preprint supplement (doi:10.20944/preprints202312.1521.v1), 2023-12-20

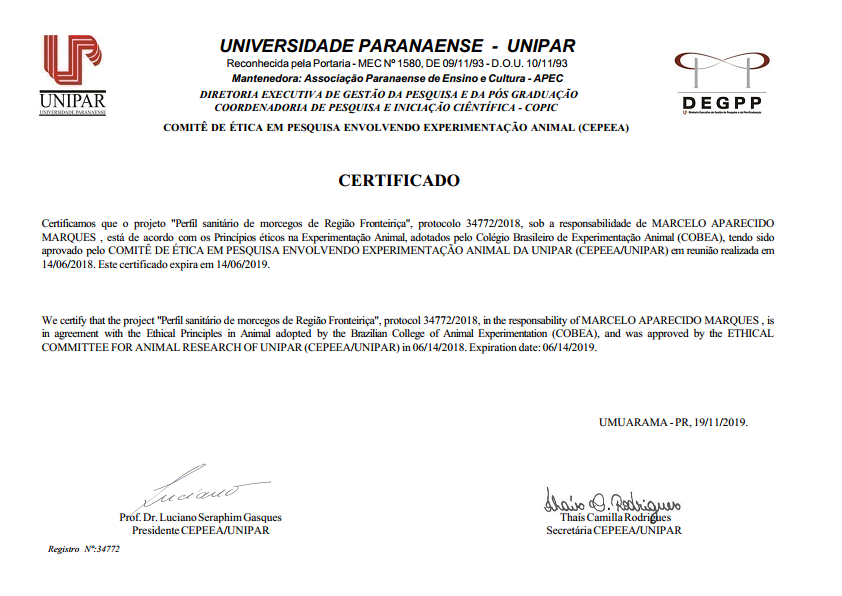
 Comitê de Ética em Pesquisa Envolvendo Experimentação Animal (CEPEEA)

Instituto Chico Mendes de Conservação da Biodiversidade (ICMBio)


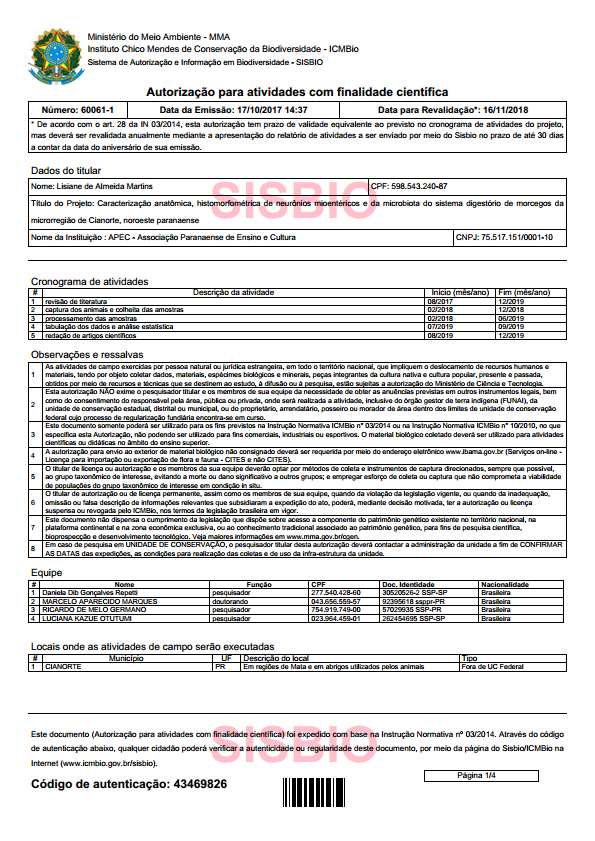

Supplement: Supplementary file 1 [file supplementary]
